# Supplementary material
Source: Springer Nature journal article supplement (https://www.springermedizin.de/resource/supplementary/12959_2008_101_MOESM6_ESM.pdf/9569598)

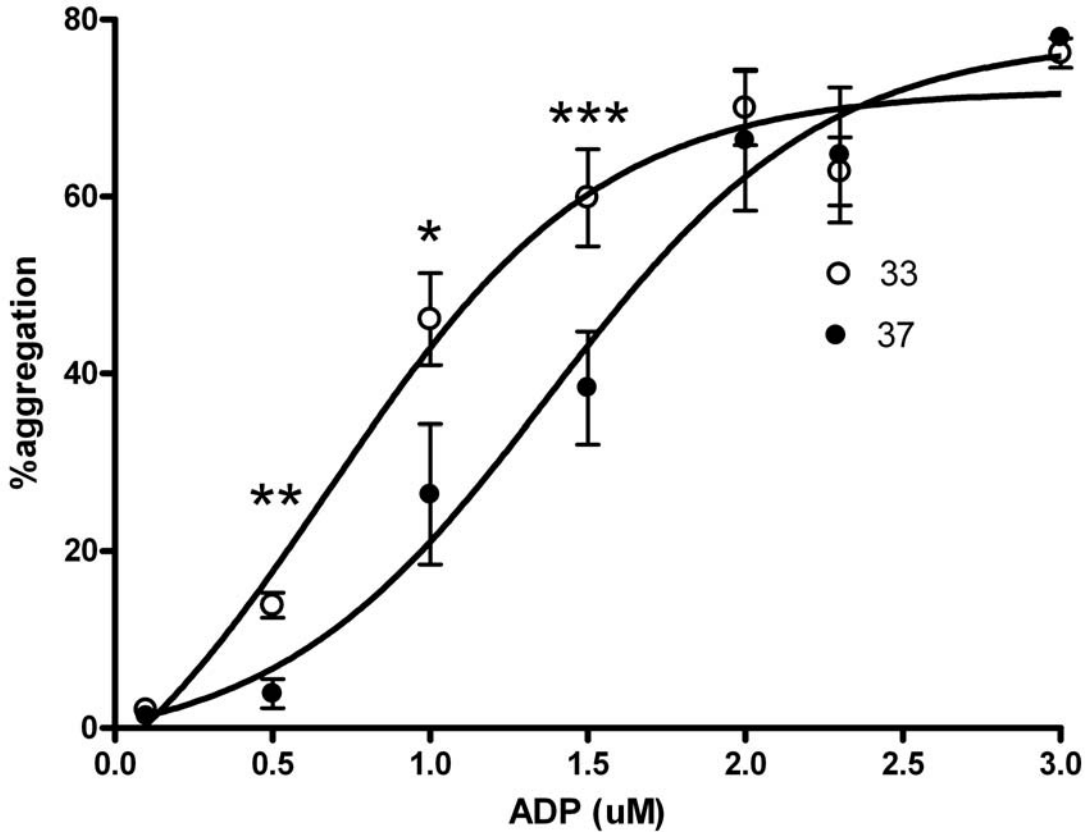

Supplement: MOESM6 [file 9569598]
